# Supplementary figures and images for: Sympathetic NPY controls glucose homeostasis, cold tolerance, and cardiovascular functions in mice
Source: PubMed Central journal article supplement — bioRxiv. 2023 Jul 26:2023.07.24.550381. Preprint. [Version 1] doi: 10.1101/2023.07.24.550381 (PMC10402010; doi:10.1101/2023.07.24.550381), 2023-07-26

*NPY<sup>DBH</sup>-tdTomato* Mouse

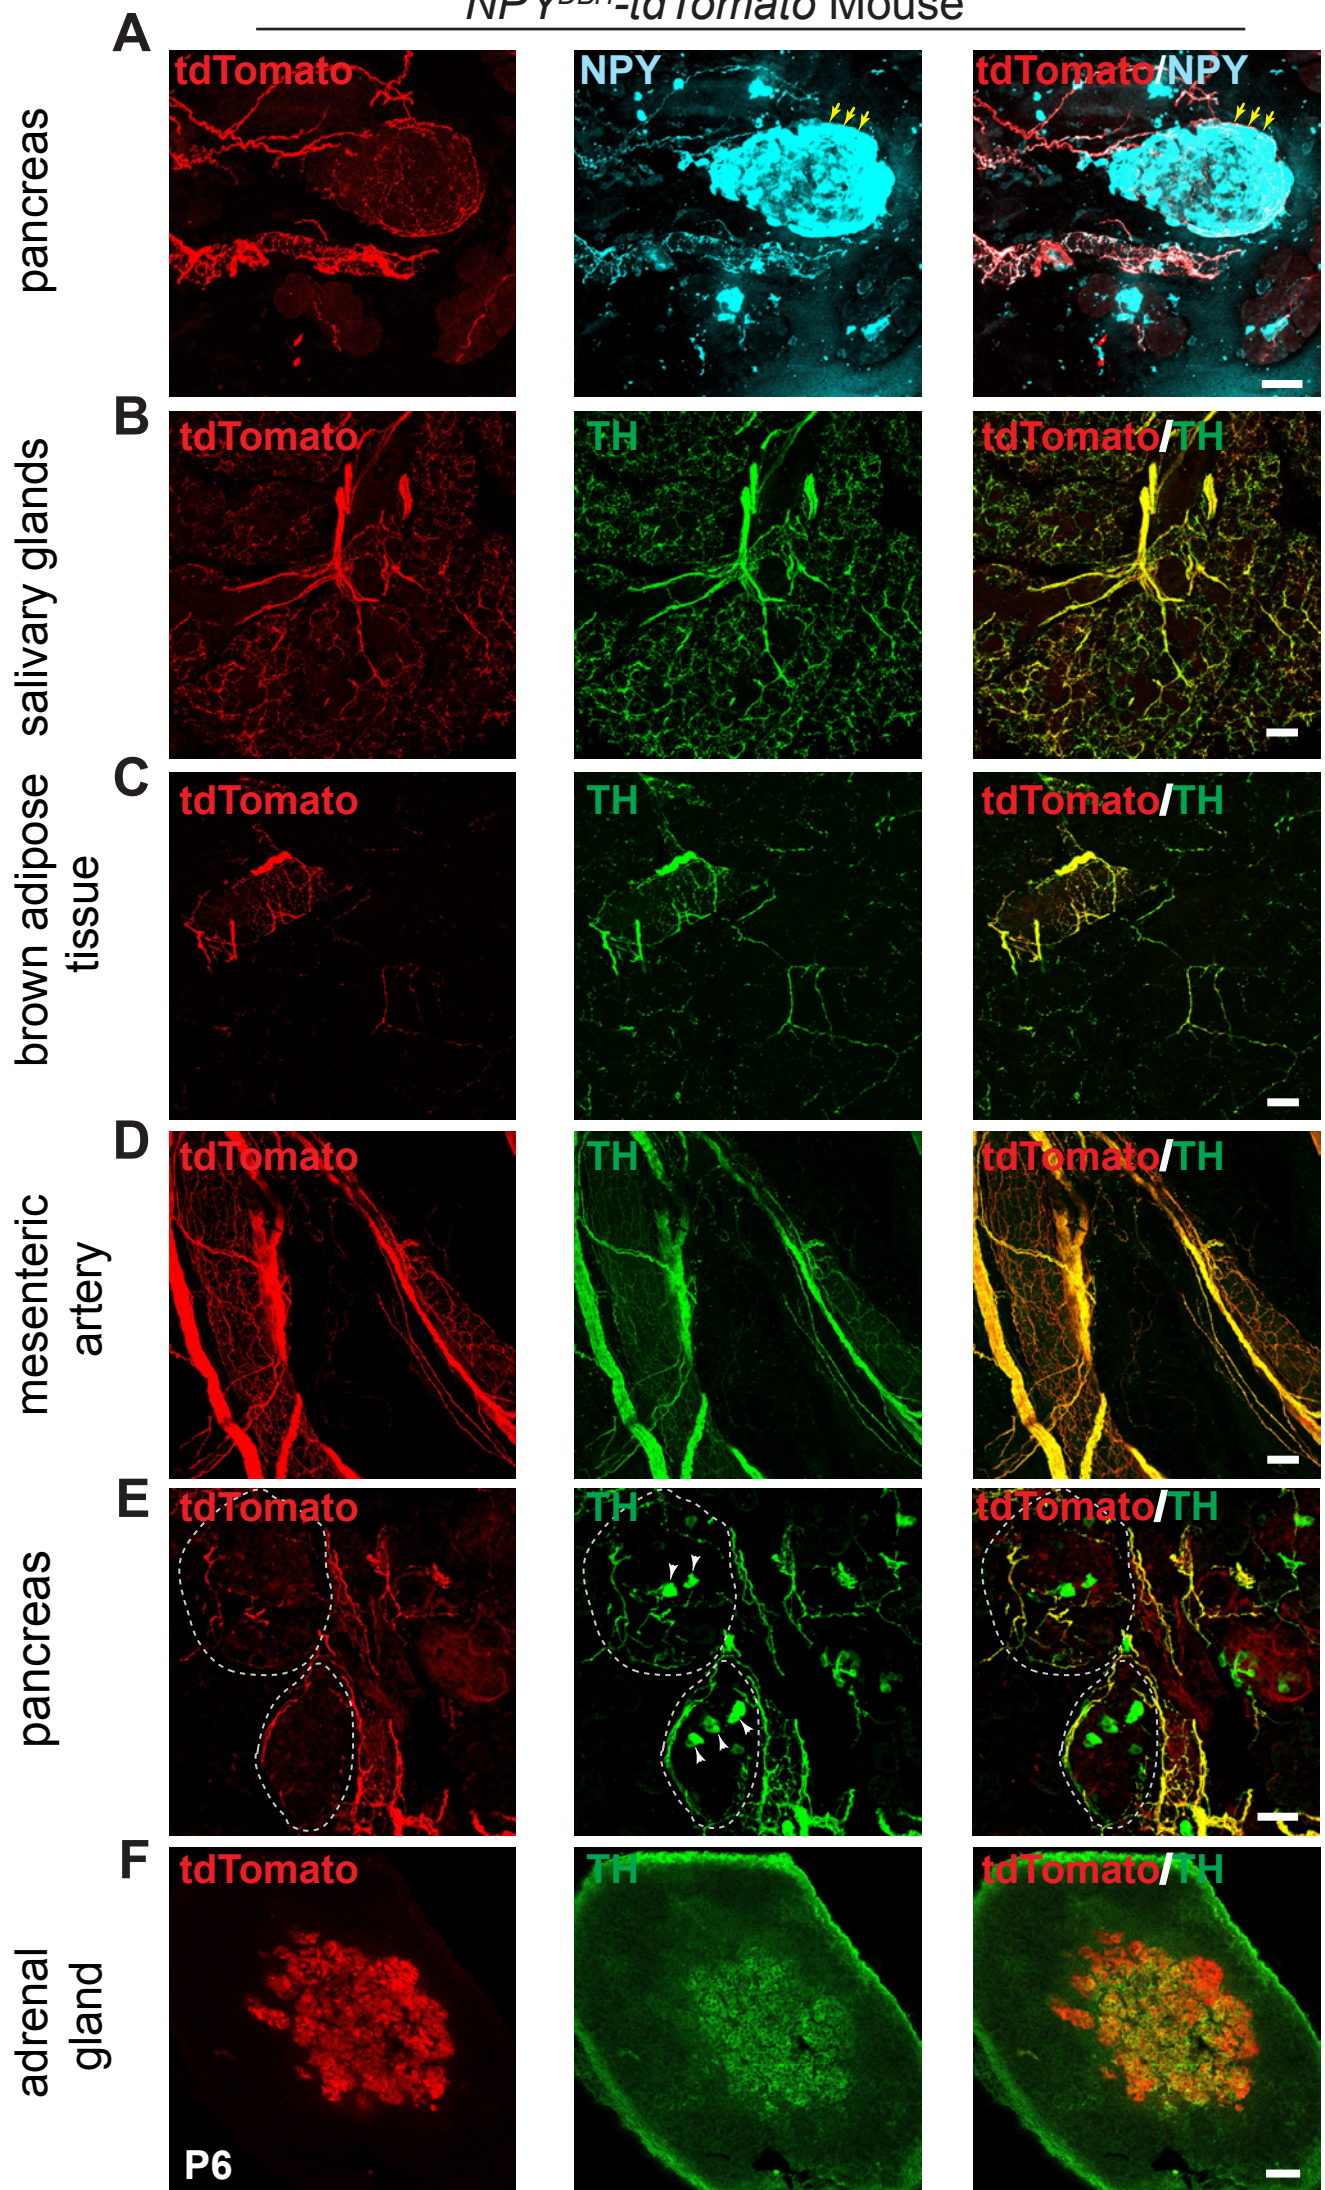

**A**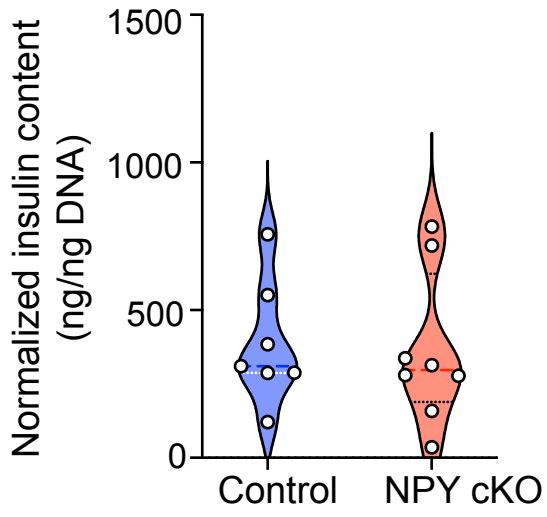**B**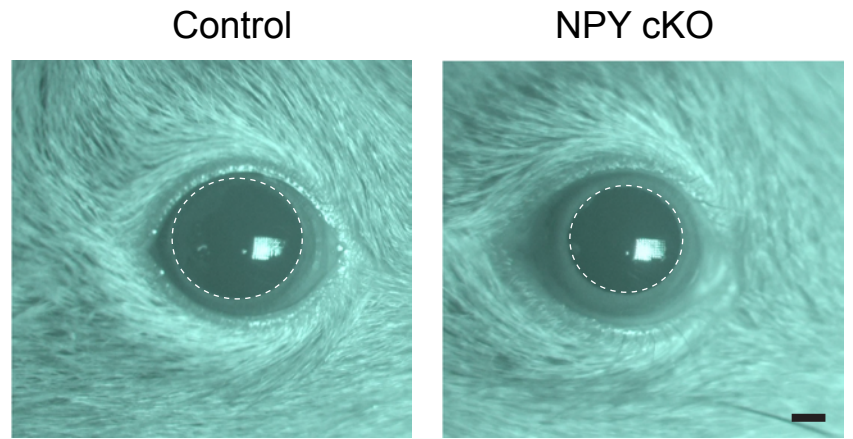**C**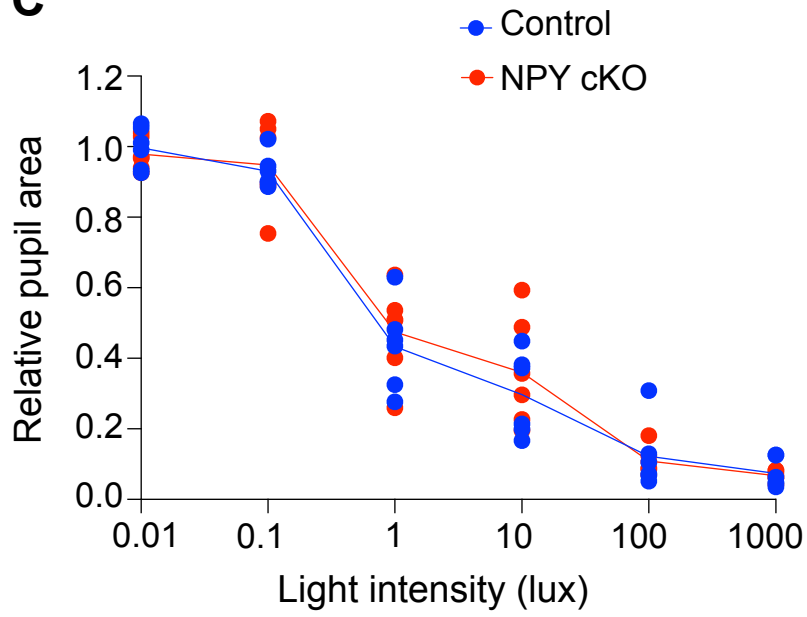

Supplement: NIHPP2023.07.24.550381v1-supplement-1.pdf [file NIHPP2023.07.24.550381v1-supplement-1.pdf]
